# Supplementary material for: Immunoprofiling Identifies Functional B and T Cell Subsets Induced by an Attenuated Whole Parasite Malaria Vaccine as Correlates of Sterile Immunity
Source: MDPI journal article supplement (doi:10.3390/vaccines10010124), 2022-01-14

## Supplementary Data

### Mura et al. Immunoprofiling Identifies Functional B and T Cell Subsets Induced by an Attenuated Whole Parasite Malaria Vaccine as Correlates of Sterile Immunity

**Supplementary Table S1:** Immune measures (out of 1,316 measures) that were modified after immunization (T1) from baseline (T0) (p value < 0.05, q value < 0.2), with 26 having a q value < 0.05 and defined as immunization signature. The names of the immune measures appears as immunemeasure.stimulant.timepoint for cellular assays and readout.specificity.timepoint for serological assays.

|    | Immune measures                    | p value  | q value  |
|----|------------------------------------|----------|----------|
| 1  | BC.SPZ.T1                          | 3,81E-06 | 1,16E-03 |
| 2  | Naïve_BC.SPZ.T1                    | 1,13E-05 | 1,72E-03 |
| 3  | B ELIspot.CSP.T1                   | 6,10E-05 | 3,71E-03 |
| 4  | MBC.SPZ.T1                         | 5,93E-05 | 3,71E-03 |
| 5  | IgD+MBC.SPZ.T1                     | 4,19E-05 | 3,71E-03 |
| 6  | IgD-MBC.SPZ.T1                     | 1,45E-04 | 7,33E-03 |
| 7  | IFA.SPZ.T1                         | 3,29E-04 | 1,43E-02 |
| 8  | B ELIspot.SPZ.T1                   | 4,72E-04 | 1,48E-02 |
| 9  | ELISA.CSP_FL.T1                    | 4,81E-04 | 1,48E-02 |
| 10 | T CD4+CXCR3-CCR6-TNFa+IFNg+.SPZ.T1 | 4,88E-04 | 1,48E-02 |
| 11 | MSD.CSP_NANP.T1                    | 9,77E-04 | 2,47E-02 |
| 12 | T CD4+CXCR3+TNFa+IFNg+.CSP.T1      | 9,77E-04 | 2,47E-02 |
| 13 | B ELIspot.MSP.T1                   | 1,12E-03 | 2,58E-02 |
| 14 | T CD4+CXCR3-CCR6-TNFa+.SPZ.T1      | 1,34E-03 | 2,58E-02 |
| 15 | lymphocytes.SPZ.T1                 | 1,36E-03 | 2,58E-02 |
| 16 | CD38hiCD24hi_BC.SPZ.T1             | 1,23E-03 | 2,58E-02 |
| 17 | ELISA.AMA1.T1                      | 1,66E-03 | 2,97E-02 |
| 18 | lymphocytes.CSP.T1                 | 1,86E-03 | 3,09E-02 |
| 19 | lymphocytes.M.T1                   | 1,93E-03 | 3,09E-02 |
| 20 | IL8.AMA1.T1                        | 2,49E-03 | 3,29E-02 |
| 21 | cTfh1_TNFa+.M.T1                   | 2,44E-03 | 3,29E-02 |
| 22 | T CD4+CXCR3+TNFa+.SPZ.T1           | 2,44E-03 | 3,29E-02 |
| 23 | T CD4+TNFa+IFNg+.CSP.T1            | 2,44E-03 | 3,29E-02 |
| 24 | B ELIspot.AMA.T1                   | 2,69E-03 | 3,40E-02 |
| 25 | cTfhCXCR3+CCR6+.CSP.T1             | 3,36E-03 | 4,00E-02 |
| 26 | T CD4+TNFa+IFNg+.CSP.T1            | 3,42E-03 | 4,00E-02 |
| 27 | IL8.CelTOS.T1                      | 4,88E-03 | 5,50E-02 |
| 28 | T CD4+TNFa+.SPZ.T1                 | 5,40E-03 | 5,86E-02 |
| 29 | B ELIspot.CelTOS.T1                | 6,12E-03 | 6,41E-02 |
| 30 | T CD4+CXCR3+TNFa+IFNg+.SPZ.T1      | 6,84E-03 | 6,93E-02 |
| 31 | T CD4+CXCR3+CCR6+.CSP.T1           | 8,47E-03 | 8,31E-02 |
| 32 | cTfh2.CSP.T1                       | 9,83E-03 | 8,54E-02 |
| 33 | T CD4+CXCR3-CCR6-IFNg+.CSP.T1      | 9,28E-03 | 8,54E-02 |
| 34 | T CD8+CXCR3+TNFa+.M.T1             | 9,28E-03 | 8,54E-02 |
| 35 | T CD8.M.T1                         | 9,83E-03 | 8,54E-02 |
| 36 | IFNg.ISPZ.T1                       | 1,07E-02 | 9,06E-02 |
| 37 | T CD8+CXCR3-CCR6-TNFa+.CSP.T1      | 1,15E-02 | 9,22E-02 |

|    |                               |          |          |
|----|-------------------------------|----------|----------|
| 38 | T CD8+CXCR3+.CSP.T1           | 1,14E-02 | 9,22E-02 |
| 39 | T CD8+.SPZ.T1                 | 1,33E-02 | 1,03E-01 |
| 40 | IL13.CSP.T1                   | 1,41E-02 | 1,07E-01 |
| 41 | IL6.CSP.T1                    | 1,61E-02 | 1,19E-01 |
| 42 | IL4.CSP.T1                    | 1,92E-02 | 1,26E-01 |
| 43 | IL4.hSPZ.T1                   | 1,99E-02 | 1,26E-01 |
| 44 | cTfh2IFNg+.M.T1               | 1,85E-02 | 1,26E-01 |
| 45 | T CD3+.M.T1                   | 1,88E-02 | 1,26E-01 |
| 46 | T CD8+CCR6+TNFa+.CSP.T1       | 1,85E-02 | 1,26E-01 |
| 47 | T CD8+CXCR3-CCR6-.CSP.T1      | 1,97E-02 | 1,26E-01 |
| 48 | T CD8+CXCR3+CCR6+IFNg+.CSP.T1 | 1,85E-02 | 1,26E-01 |
| 49 | T CD4+CXCR3+CCR6+IFNg+.M.T1   | 2,10E-02 | 1,28E-01 |
| 50 | T CD8+CCR6+IFNg+.CSP.T1       | 2,10E-02 | 1,28E-01 |
| 51 | IL13.CelTOS.T1                | 2,22E-02 | 1,32E-01 |
| 52 | IL13.hSPZ.T1                  | 2,32E-02 | 1,34E-01 |
| 53 | cTfh2IFNg+.CSP.T1             | 2,34E-02 | 1,34E-01 |
| 54 | cTfhCXCR3+CCR6+IFNg+.M.T1     | 2,69E-02 | 1,46E-01 |
| 55 | T CD4+CXCR3+IFNg+.CSP.T1      | 2,69E-02 | 1,46E-01 |
| 56 | T CD4+CXCR3-CCR6-IFNg+.M.T1   | 2,69E-02 | 1,46E-01 |
| 57 | cTfh.SPZ.T1                   | 2,74E-02 | 1,46E-01 |
| 58 | cTfr.M.T1                     | 3,02E-02 | 1,58E-01 |
| 59 | T CD4+CCR6+IFNg+.M.T1         | 3,42E-02 | 1,73E-01 |
| 60 | T CD4+TNFa+IFNg+.SPZ.T1       | 3,42E-02 | 1,73E-01 |
| 61 | IL12.CelTOS.T1                | 3,60E-02 | 1,80E-01 |

---

BC = B cells ; MBC = memory B cells ; T = T lymphocytes ; cTfh = circulating follicular helper T cells ;  
cTfr = circulating follicular regulatory T cells ; hSPZ/ISPZ = high/low dose of sporozoites.

**Supplementary Table S2:** Antibodies used for B cell and T cell flow cytometry panels.

| <b>B cell panel: antibodies</b>      | <b>Provider</b> | <b>reference</b> | <b>dilution</b> | <b>clone</b> |
|--------------------------------------|-----------------|------------------|-----------------|--------------|
| L/D fixable blue dead cell stain kit | ThermoFisher    | L23105           | 1:250           | -            |
| CD19 PercP-Vio700                    | Miltenyi        | 130-113-733      | 1:100           | LT19         |
| CD20 APC-Vio770                      | Miltenyi        | 130-111-341      | 1:50            | REA780       |
| CD24-PE                              | Miltenyi        | 130-112-656      | 1:50            | REA832       |
| IgD-FITC                             | Miltenyi        | 130-124-213      | 1:50            | IgD26        |
| CD27-PE Vio770                       | Miltenyi        | 130-113-641      | 1:50            | REA499       |
| CD69-BV711                           | BD Biosciences  | 310944           | 1:10            | FN50         |
| CD38-APC                             | Miltenyi        | 130-123-852      | 1:100           | REA671       |
| CD3-Vioblue                          | Miltenyi        | 130-113-133      | 1:20            | BW264/56     |

| <b>T cell panel: antibodies</b>      | <b>Provider</b> | <b>reference</b> | <b>dilution</b> | <b>clone</b> |
|--------------------------------------|-----------------|------------------|-----------------|--------------|
| L/D fixable blue dead cell stain kit | ThermoFisher    | L23105           | 1:250           | -            |
| Anti-biotin microbeads UP            | Miltenyi        | 130-105-637      | 1:5             | -            |
| CD69-biotin                          | Miltenyi        | 130-112-609      | 1:50            | REA824       |
| CD8 FITC                             | Miltenyi        | 130-110-509      | 1:50            | REA715       |
| Anti-biotin PE                       | Miltenyi        | 130-110-951      | 1:50            | REA746       |
| CXCR5 PEVio770                       | Miltenyi        | 130-117-358      | 1:50            | REA103       |
| CD3 Percp-Cy5.5                      | BD Biosciences  | 340949           | 1:5             | SK7          |
| CXCR3 BV711                          | BD Biosciences  | 563156           | 1:10            | 1C6/CXCR3    |
| CCR6-APC R700                        | BD Biosciences  | 565173           | 1:50            | 11A9         |
| CD4 APC H7                           | BD Biosciences  | 560158           | 1:50            | RPA-T4       |
| Foxp3 PE CF594                       | BD Biosciences  | 562421           | 1:20            | 259D/C7      |
| TNFa V450                            | BD Biosciences  | 561311           | 1:20            | MAb11        |
| IFNg APC                             | BD Biosciences  | 551385           | 1:100           | 4SB3         |

Supplementary Figure S1: T cell gating strategy.

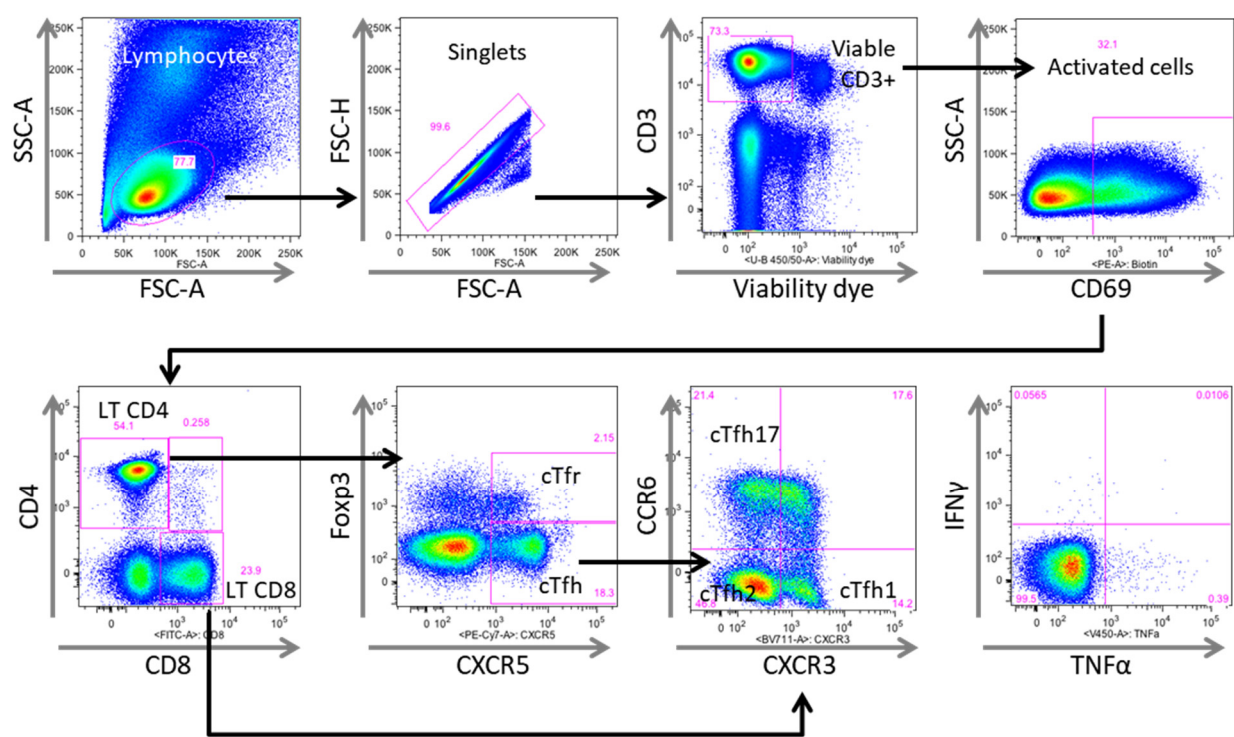

Supplementary Figure S2: B cell gating strategy.

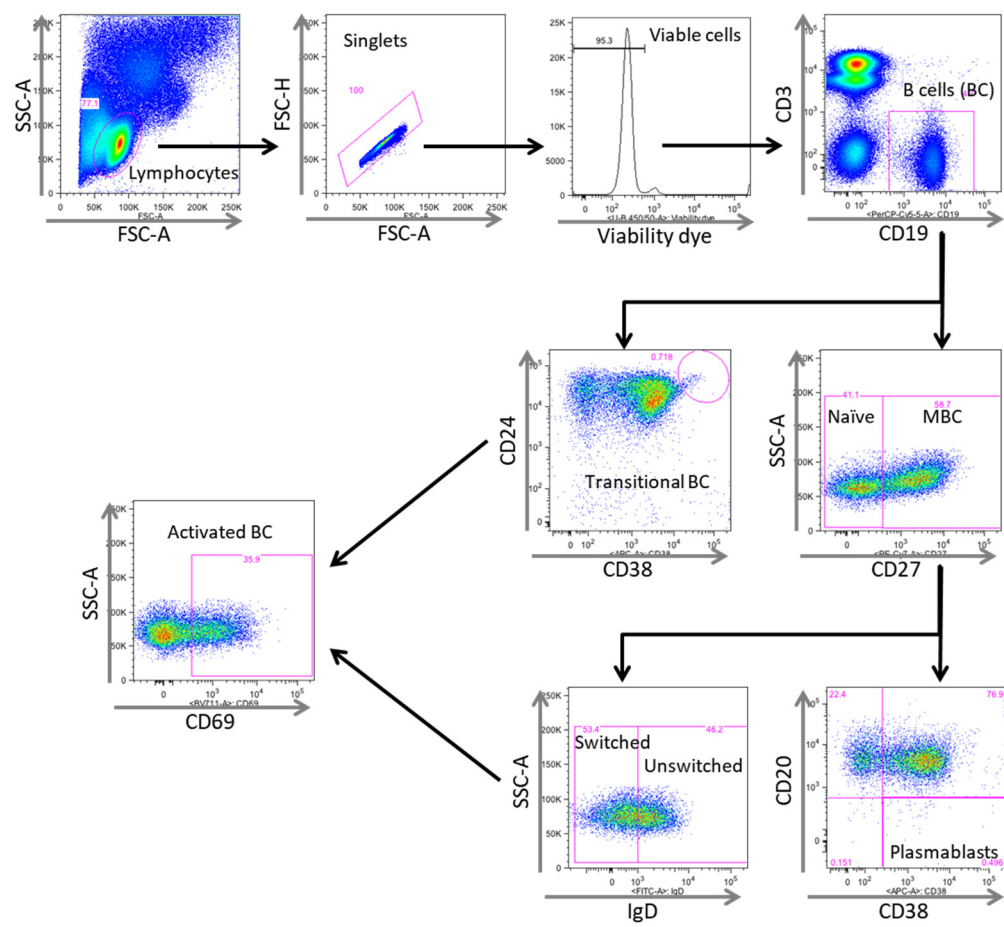

**Supplementary Figure S3: Workflow of computational and statistical analysis**

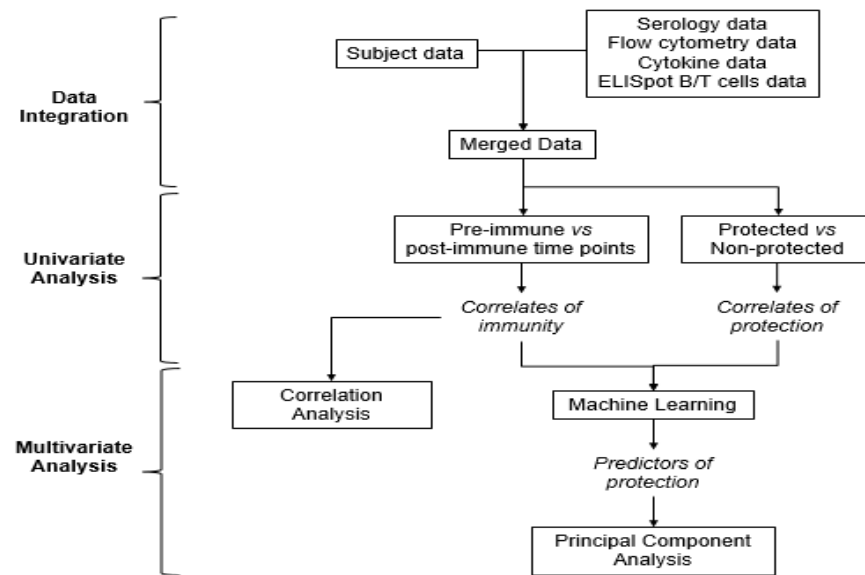

**Supplementary Figure S4: Correlation matrices of cytokines pattern response** measured in the supernatant of PBMCs at T1, after 48 hours of stimulation with AMA-1, CelTOS, CSP, SPZ at low (ISPZ) or high level (hSPZ) and TRAP. (A) Correlation matrices including only protected volunteers (n=8). (B) Correlation matrices including only non-protected volunteers (n=4). Only significant correlations (Spearman,  $\rho > 0.4$ ,  $p < 0.05$ ) are represented on the maps.

(A) Protected subjects

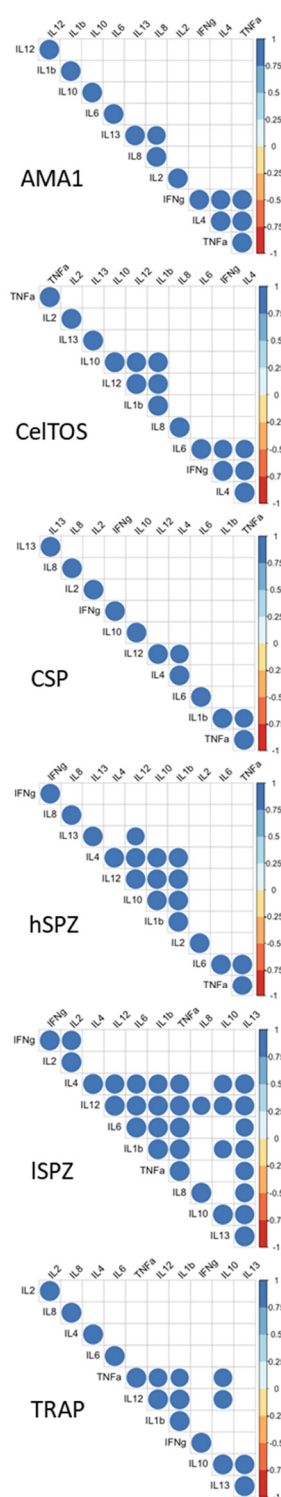

(B) Not protected subjects

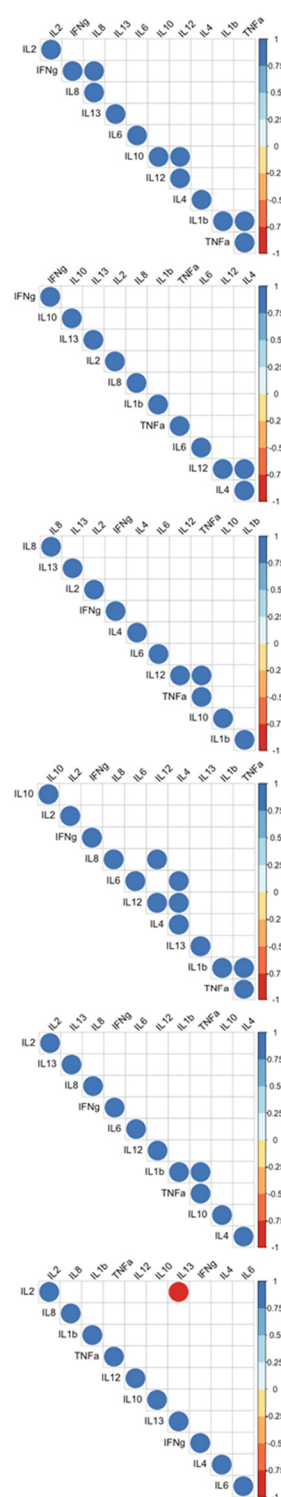

Supplement: s1 [file s1]
